# Supplementary material for: Silica-assisted bottom-up synthesis of graphene-like high surface area carbon for highly efficient ultracapacitor and Li-ion hybrid capacitor applications
Source: Royal Society of Chemistry journal article supplement (doi:10.1039/c6ta00868b), 2016-01-01
Supplement: c6ta00868b1.pdf [file c6ta00868b1.pdf]

**Electronic Supplementary Information (ESI)**

**Silica-assisted bottom-up synthesis of graphene-like high surface area carbon for highly efficient ultracapacitor and Li-ion hybrid capacitor applications.**

Dattakumar Mhamane,<sup>a</sup> Vanchiappan Aravindan,<sup>\*b</sup> Myeong -Seong Kim,<sup>a</sup> Hyun-Kyung Kim,<sup>a, c</sup> Kwang Chul Roh,<sup>d</sup> Dianbo Ruan,<sup>a</sup> Sang Hyun Lee,<sup>e</sup> Madhavi Srinivasan,<sup>\*b, f</sup> and Kwang-Bum Kim<sup>\*a</sup>

<sup>a</sup>*Department of Materials Science and Engineering, Yonsei University, 134 Shinchon-dong, Seodaemoon-gu, Seoul 120-749, Republic of Korea. Tel: +82-2-3657745, E-mail: [kbkim@yonsei.ac.kr](mailto:kbkim@yonsei.ac.kr)*

<sup>b</sup>*Energy Research Institute @ NTU (ERI@N), Research techno Plaza, Nanyang Technological University, Singapore 637553, Singapore. Email: [aravind\\_van@yahoo.com](mailto:aravind_van@yahoo.com)*

<sup>c</sup>*Department of Materials Science and Metallurgy, University of Cambridge, 27 Charles Babbage Road, Cambridge CB3 0FS, UK*

<sup>d</sup>*Energy Efficient Materials Team, Energy & Environmental Division Korea Institute of Ceramic Engineering & Technology 101, Soho-ro, Jinju 660-031, Republic of Korea.*

<sup>e</sup>*SkyChem, A-304 Keumkang IT Tower, Jungwon-gu Seongnam 462-901, Republic of Korea*

<sup>f</sup>*School of Materials Science and Engineering, Nanyang Technological University, Singapore 639798, Singapore.*

Table S1 C/O atomic ratio comparison of BTCADC and A–BTCADC with RGO based materials.

| Sr. No. | Materials (Form)                      | C/O ratio | Refs.     |
|---------|---------------------------------------|-----------|-----------|
| 1       | Reduced GO (Powder)                   | ~10.3     | 3         |
| 2       | NaBH <sub>4</sub> reduced GO (Powder) | ~8.6      | 34        |
| 3       | Hydrazine vapor reduced GO (Film)     | ~8.8      | 35        |
| 4       | Vitamin C reduced GO (Film)           | ~12       | 14        |
| 5       | Hydro Iodic Acid Reduced (Film)       | ~14.9     | 36        |
| 6       | RGO (This work)                       | ~10       | This Work |
| 7       | BTCADC (This work)                    | ~19       | This Work |
| 8       | A–BTCADC (This work)                  | ~18       | This Work |

Table S2 XPS fitting results of C 1s spectra for RGO, BTCADC, and A–BTCADC.

| Sr. No. | Materials | C=C + C-C            | C-O  | C=O  | O-C=O |
|---------|-----------|----------------------|------|------|-------|
| 1       | RGO       | 70.4 + 13.01 = 83.41 | 6.45 | 5.15 | 4.96  |
| 2       | BTCADC    | 81.54 + 9.40 = 90.94 | 4.92 | 2.64 | 1.41  |
| 3       | A–BTCADC  | 79.1 + 11.7 = 90.80  | 4.97 | 2.62 | 1.51  |

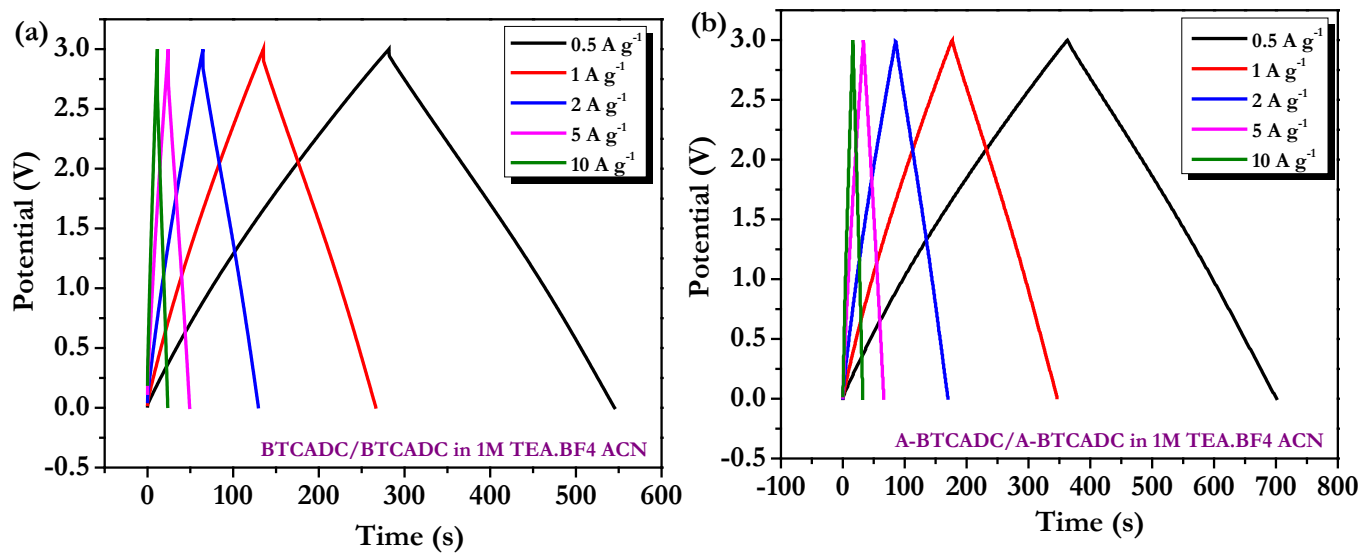

Figure S1. Typical galvanostatic charge-discharge curves of (a) BTCADC and (b) A-BTCADC based electrodes in symmetric supercapacitor configuration in 1M TEABF<sub>4</sub>·ACN at various current densities. Here the current density is based on the total mass loading of the electrodes.

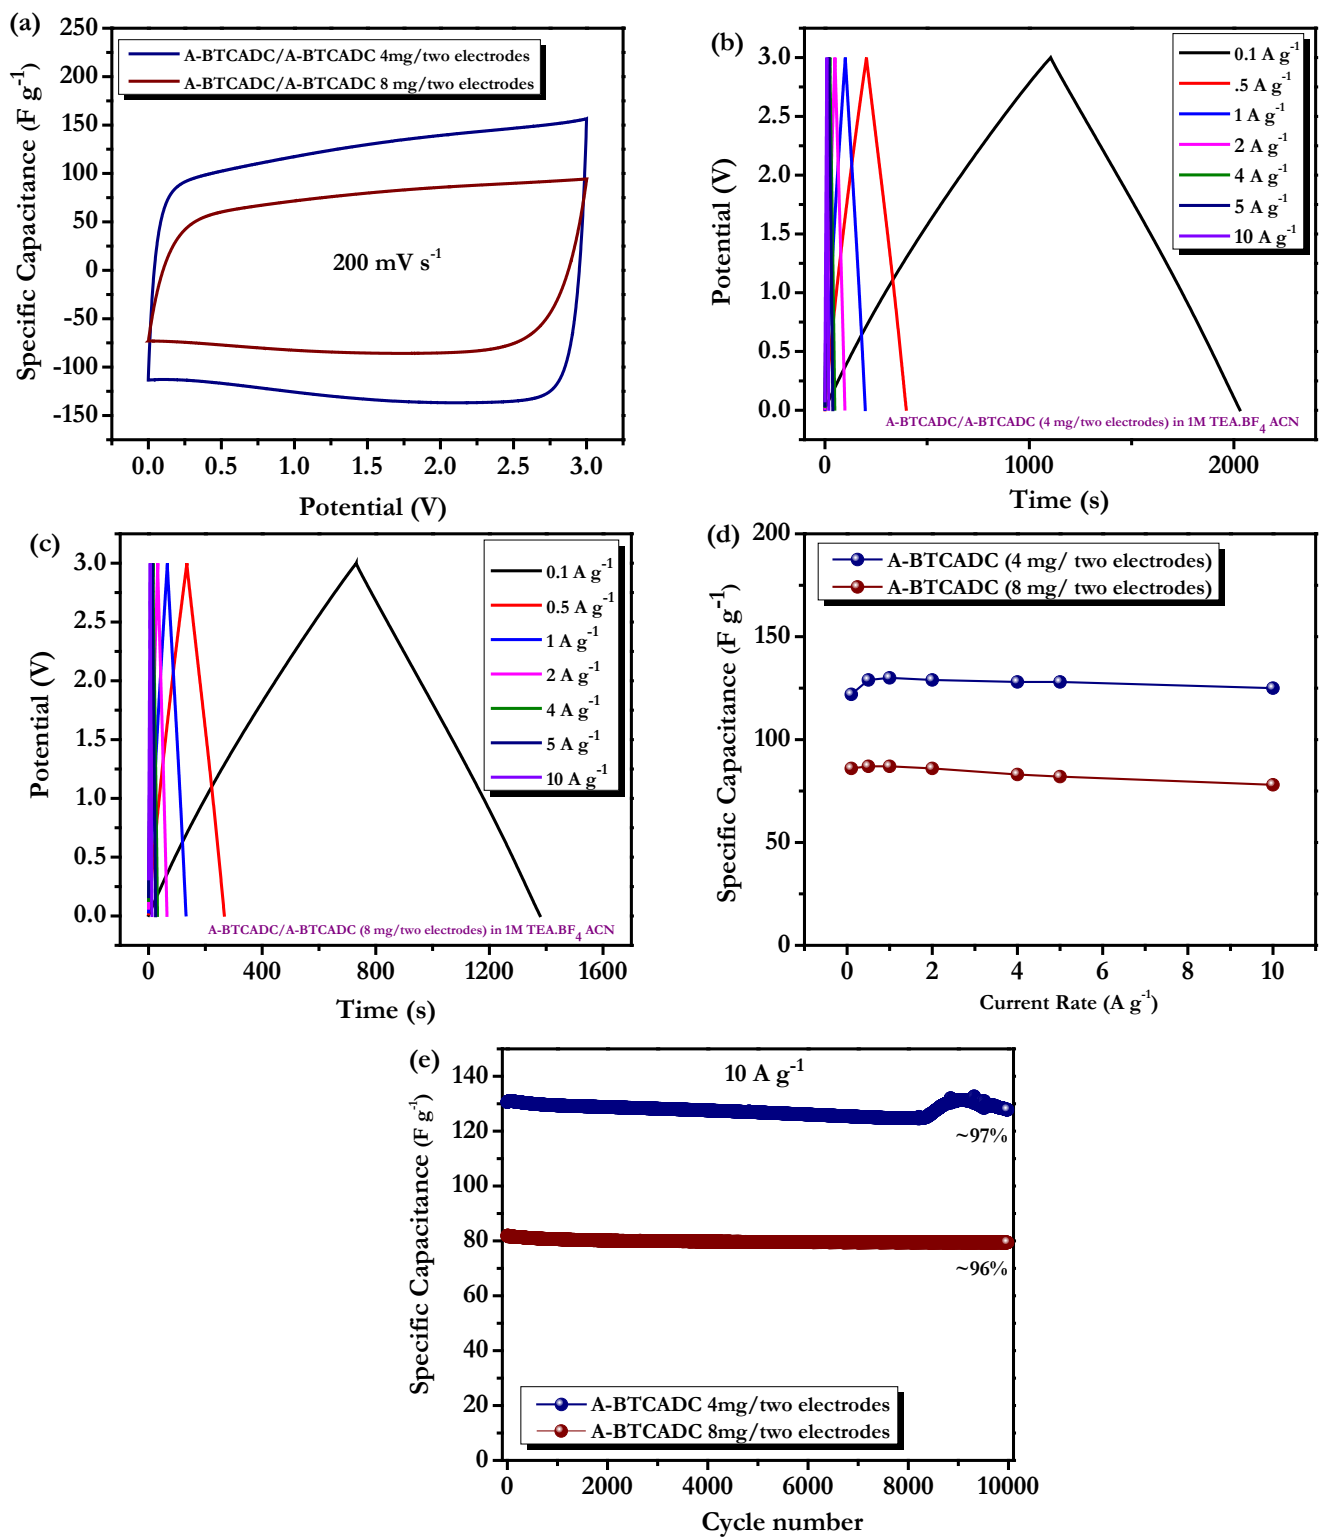

Figure S2. (a) Comparison of cyclic voltammograms traces for A-BTCADC electrodes with higher loadings (4 mg and 8 mg per two electrodes) at the scan rate of  $200 \text{ mV s}^{-1}$  ( $C_{\text{sp}}$  vs. potential plot); (b) Galvanostatic charge-discharge plots for A-BTCADC (4 mg/ two electrode cell) at various current rates; (c) Galvanostatic charge-discharge plots for A-BTCADC (8 mg/ two electrode cell) at various current rates; and (d) Cycle stability plots ( $C_{\text{sp}}$  vs. cycle number) for A-BTCADC bases cells at  $10 \text{ A g}^{-1}$  in 1M TEA.BF<sub>4</sub> ACN between 0 – 3V.

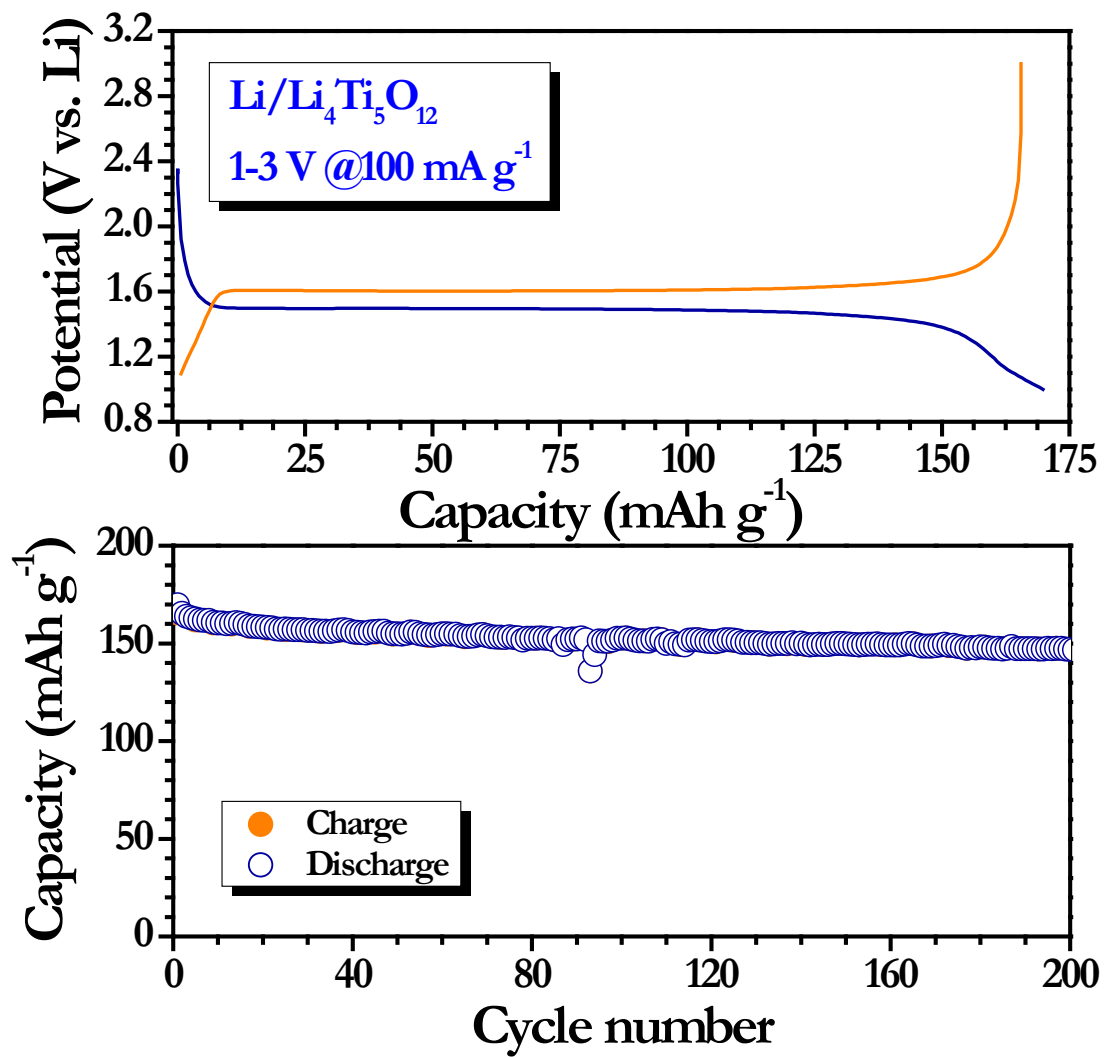

Figure S3. Galvanostatic charge-discharge curves of Li/Li<sub>4</sub>Ti<sub>5</sub>O<sub>12</sub> (Aldrich, USA) cell cycled between 1-3 V at constant current density of 100 mA g<sup>-1</sup> in 1M LiPF<sub>6</sub>, and (b) Plot of discharge capacity *vs.* cycle number.

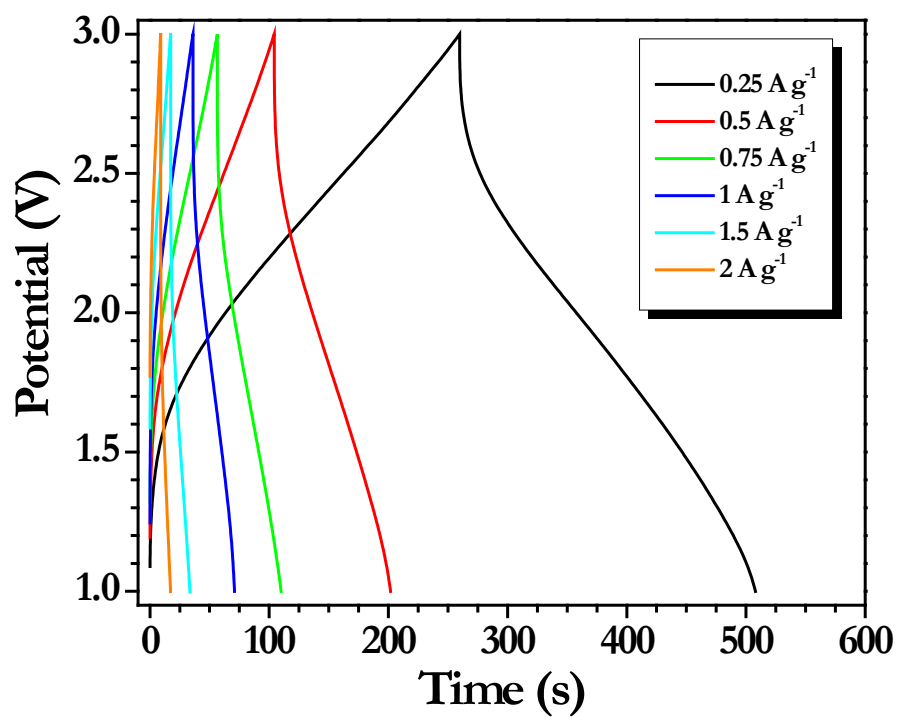

Figure S4. Galvanostatic charge-discharge profiles of commercially available activated carbon (CAC)/ Li<sub>4</sub>Ti<sub>5</sub>O<sub>12</sub> Li-HEC tested between 1-3 V at various current densities in 1M LiPF<sub>6</sub>.
